# Supplementary material
Source: PubMed Central journal article supplement (PMC3454527)
Supplement: NIHMS405836-supplement-supplementary_data.pdf [file NIHMS405836-supplement-supplementary_data.pdf]

## SUPPLEMENTARY DATA

### 1. Swell ratio of PDMS in 51 different organic solvents

**Table S1.** Screening of solvents for their swelling capability for PDMS and solubility of PS

| Solvents |                                           | PDMS Swell Ratio | PS Solubility |
|----------|-------------------------------------------|------------------|---------------|
| #        | Name                                      |                  |               |
| 1        | water                                     | 1.00 *           |               |
| 2        | glycerol                                  | 1.00 *           |               |
| 3        | ethylene glycol                           | 1.00 *           |               |
| 4        | perfluorotributylamine                    | 1.00 *           |               |
| 5        | perfluorodecalin                          | 1.00 *           |               |
| 6        | gamma-butyrolactone                       | 1.00             | +             |
| 7        | dimethyl sulfoxide                        | 1.00 *           |               |
| 8        | delta-valerolactone                       | 1.00             | +             |
| 9        | gamma-valerolactone                       | 1.00             | +             |
| 10       | nitromethane                              | 1.00 *           |               |
| 11       | tetramethylene sulfone                    | 1.00 *           |               |
| 12       | acetonitrile                              | 1.01 *           |               |
| 13       | propylene carbonate                       | 1.01 *           |               |
| 14       | trifluoroethanol                          | 1.01 *           |               |
| 15       | delta-caprolactone                        | 1.01             | +             |
| 16       | dimethylformamide                         | 1.02 *           | +             |
| 17       | methanol                                  | 1.02 *           |               |
| 18       | 1,1,3,3-tetramethylurea                   | 1.02 *           | +             |
| 19       | 1-methyl-2-pyrrolidone                    | 1.03 *           | +             |
| 20       | dimethyl carbonate                        | 1.03 *           | +             |
| 21       | 1-methoxy-2-propanol                      | 1.03             |               |
| 22       | ethanol                                   | 1.04 *           |               |
| 23       | 1-butanol                                 | 1.05             |               |
| 24       | acetone                                   | 1.06 *           |               |
| 25       | pyridine                                  | 1.06 *           |               |
| 26       | propylene glycol monomethyl ether acetate | 1.07             |               |
| 27       | cyclopentanone                            | 1.08             |               |
| 28       | isopropanol                               | 1.09 *           |               |
| 29       | 4-methyl-2-pentanone                      | 1.16             |               |
| 30       | 1,4-dioxane                               | 1.16*            |               |
| 31       | ethyl acetate                             | 1.18*            |               |
| 32       | 2-heptanone                               | 1.20             |               |
| 33       | 2-butanone                                | 1.21             |               |
| 34       | tert-butyl alcohol                        | 1.21 *           |               |
| 35       | methylenechloride                         | 1.22 *           |               |
| 36       | butyl acetate                             | 1.22             |               |
| 37       | chlorobenzene                             | 1.22 *           |               |
| 38       | benzene                                   | 1.28             |               |
| 39       | toluene                                   | 1.31 *           |               |
| 40       | dimethoxyethane                           | 1.32 *           |               |
| 41       | cyclohexane                               | 1.33 *           |               |
| 42       | heptane                                   | 1.34 *           |               |
| 43       | trichloroethylene                         | 1.34 *           |               |
| 44       | hexane                                    | 1.35 *           |               |
| 45       | diethyl ether                             | 1.38 *           |               |
| 46       | tetrahydrofuran                           | 1.38 *           |               |
| 47       | chloroform                                | 1.39 *           |               |
| 48       | xylene                                    | 1.41 *           |               |
| 49       | pentane                                   | 1.44 *           |               |
| 50       | triethylamine                             | 1.58 *           |               |
| 51       | diisopropylamine                          | 2.13 *           |               |

\* denotes the swell ratio data obtained from reference 26.

## 2. Apparent deformation of PDMS mold by solvent

To show that swelling of the PDMS mold will lead to its distortion and is unsuitable for replication, 2 mL PS solution (25 wt% in toluene) was added to a PDMS sheet (75 mm × 50 mm × 0.5 mm). Within 5 min, the PDMS sheet curled due to the swelling caused by the toluene (Fig. S1A). In contrast, when 2 mL of PS solution (25 wt% in GBL) was added to a PDMS sheet (75 mm × 50 mm × 0.5 mm), the PDMS sheet did not show distortion even after 2 h at room temperature (Fig. S1B).

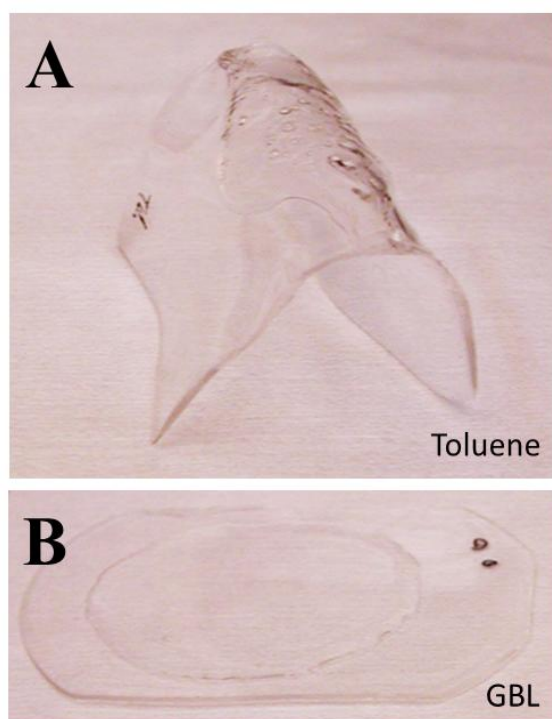

**Fig. S1.** Swelling test of PDMS by solvents. (A) A PDMS slab exposed to polystyrene dissolved in toluene. (B) A PDMS slab exposed to polystyrene in GBL. In both “A” and “B”, 2 mL of polystyrene solution (25 wt% in solvent) was placed on the PDMS surface. The toluene solution swelled and distorted the PDMS slab within 5 min, while the GBL solution showed no swelling or distortion of the PDMS slab after 2 h.

### 3. Baking temperature for PS solution in GBL

Various temperatures (100°C, 150°C and 200°C) were tested for baking the PS solution (25% in GBL). The remaining weight of PS solution (expressed as relative weight) vs. baking time is shown in Fig. S2. The optimal temperature was 150°C with a bake time of 16 h. Very little (~0.6%) GBL was left in PS under these baking conditions. If required, a higher temperature (200°C) can be used to completely evaporate GBL.

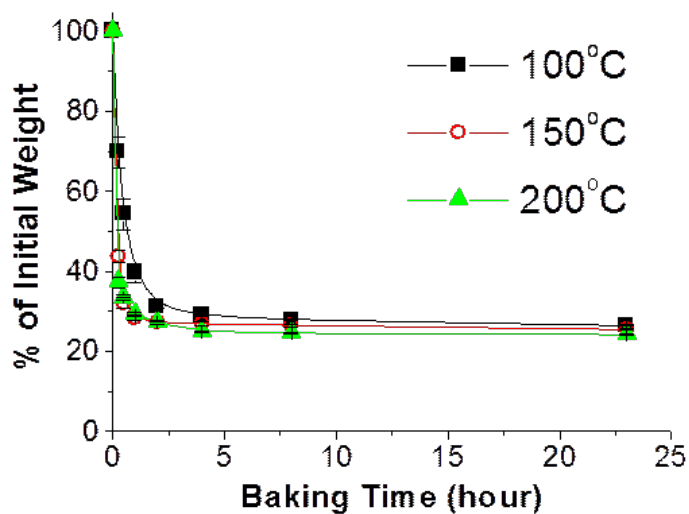

**Fig. S2.** Weight change (expressed as % of initial weight) vs. baking time for PS solution (25% in GBL).
